# Supplementary material for: Diagnostic Efficacy of Carotid Ultrasound for Predicting the Risk of Perioperative Hypotension or Fluid Responsiveness: A Meta-Analysis
Source: MDPI journal article supplement (doi:10.3390/diagnostics13132290), 2023-07-06

**Supplemental Table S1.** Search strategies for Medline

|   |                                                                                                                                                                                 |
|---|---------------------------------------------------------------------------------------------------------------------------------------------------------------------------------|
| 1 | ("General anesthesia" or "Surgery" or "Surgical procedures" or "Regional anesthesia" or "Spinal anesthesia" or "Epidural anesthesia").mp.                                       |
| 2 | exp "Anesthesia, General"/ or exp "Anesthesia, Conduction"/ or exp "Surgical Procedures, Operative"/                                                                            |
| 3 | ("Carotid artery" or "carotid artery-corrected flow time" or "respiratory variations of peak blood flow velocity" or "respirophasic variation in blood flow peak velocity").mp. |
| 4 | exp "Carotid Artery, Common"/                                                                                                                                                   |
| 5 | ("Sonography" or "Echography" or "Ultrasonographic" or "Ultrasonography" or "Ultrasound").mp.                                                                                   |
| 6 | exp "Ultrasonography"/                                                                                                                                                          |
| 7 | ("Hypotension" or "Fluid responsiveness" or "Fluid challenge" or "Dehydration" or "hypotensive").mp.                                                                            |
| 8 | (1 or 2) and (3 or 4) and (5 or 6) and 7                                                                                                                                        |

**Supplemental Figure S1.** Deek's funnel plot asymmetry test indicated a low risk of publication bias for the association of corrected blood flow time (FTc) with perioperative hypotension.

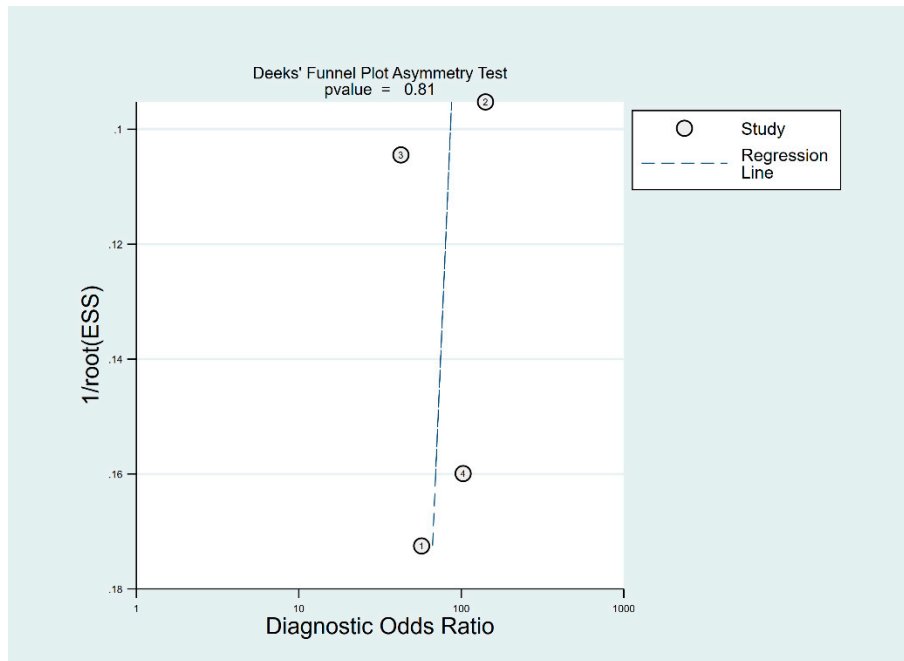

**Supplemental Figure S2.** Deek's funnel plot asymmetry test indicated a low risk of publication bias for the association of corrected blood flow time (FTc) with perioperative fluid responsiveness.

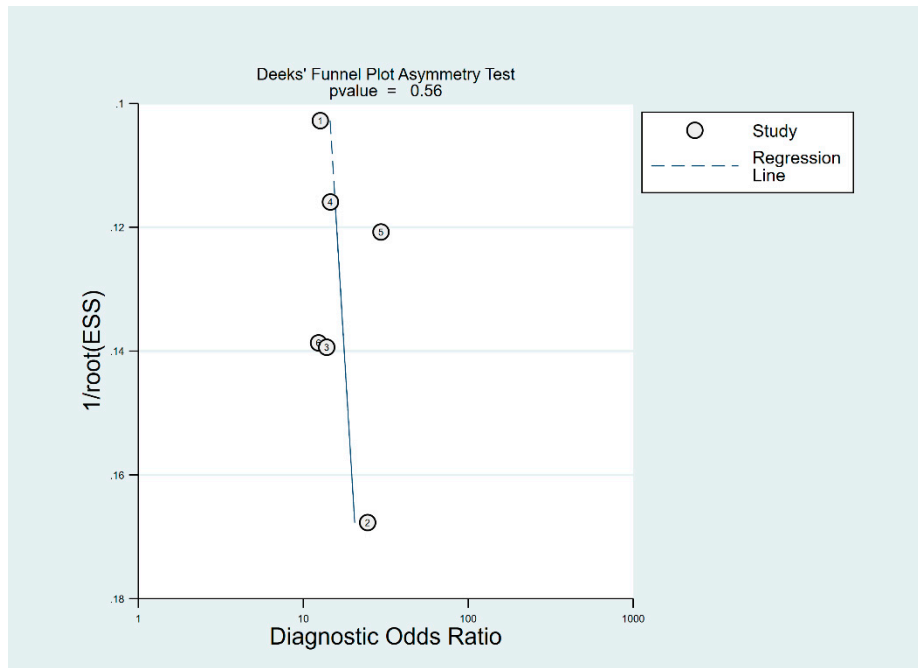

**Supplemental Figure S3.** Deek's funnel plot asymmetry test indicated a potential risk of publication bias for the association of respirophasic variation in carotid artery blood flow peak velocity ( $\Delta V_{peak}$ ) with perioperative fluid responsiveness

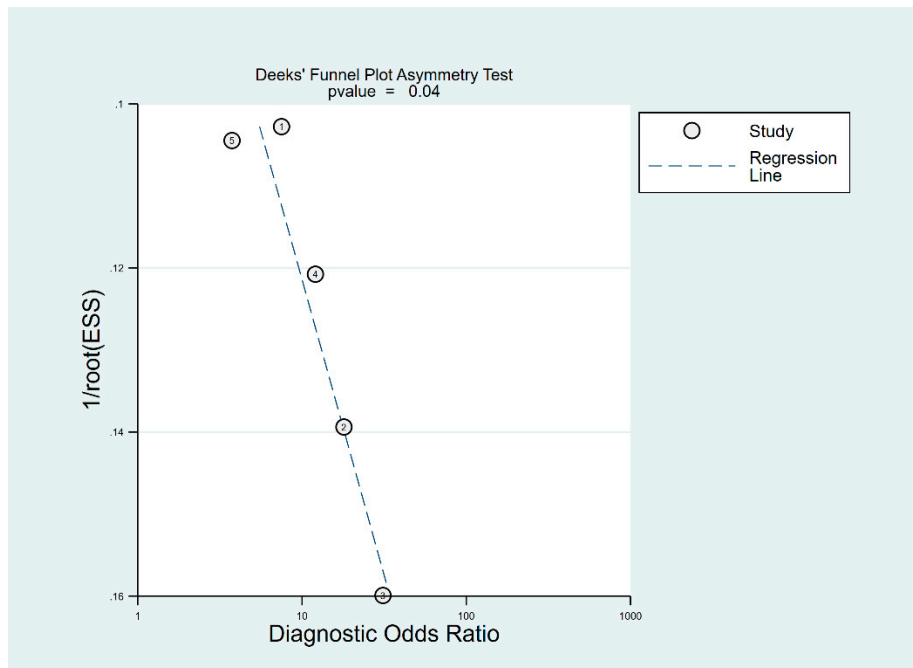

Supplement: s1 [file s1]
